# Supplementary material
Source: Research Square preprint supplement (doi:10.21203/rs.3.rs-9414478/v1)
Supplement: Supplementary file 1 [file 026e529a4571beb0a00fe6db.docx]

**Scheme 1**: Synthesis of aminoalkyl derivatives of carvacrol

**Scheme 2**: A Proposed reaction mechanism for the formation of aminoalkyl derivatives of carvacrol.
