# Supplementary material
Source: Research Square preprint supplement (doi:10.21203/rs.3.rs-9414478/v1)
Supplement: Supplementary file 2 [file f17596e226a8aec54f007b6e.docx]

Supplementary

1H-NMR spectra of compound 2


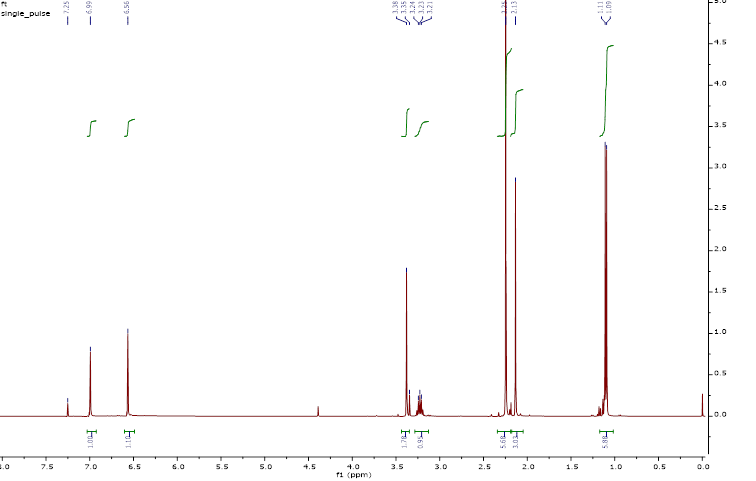


Fig.S1: 1H-NMR spectra of compound 2

Fig.S2: 13C NMR spectra of compound 2


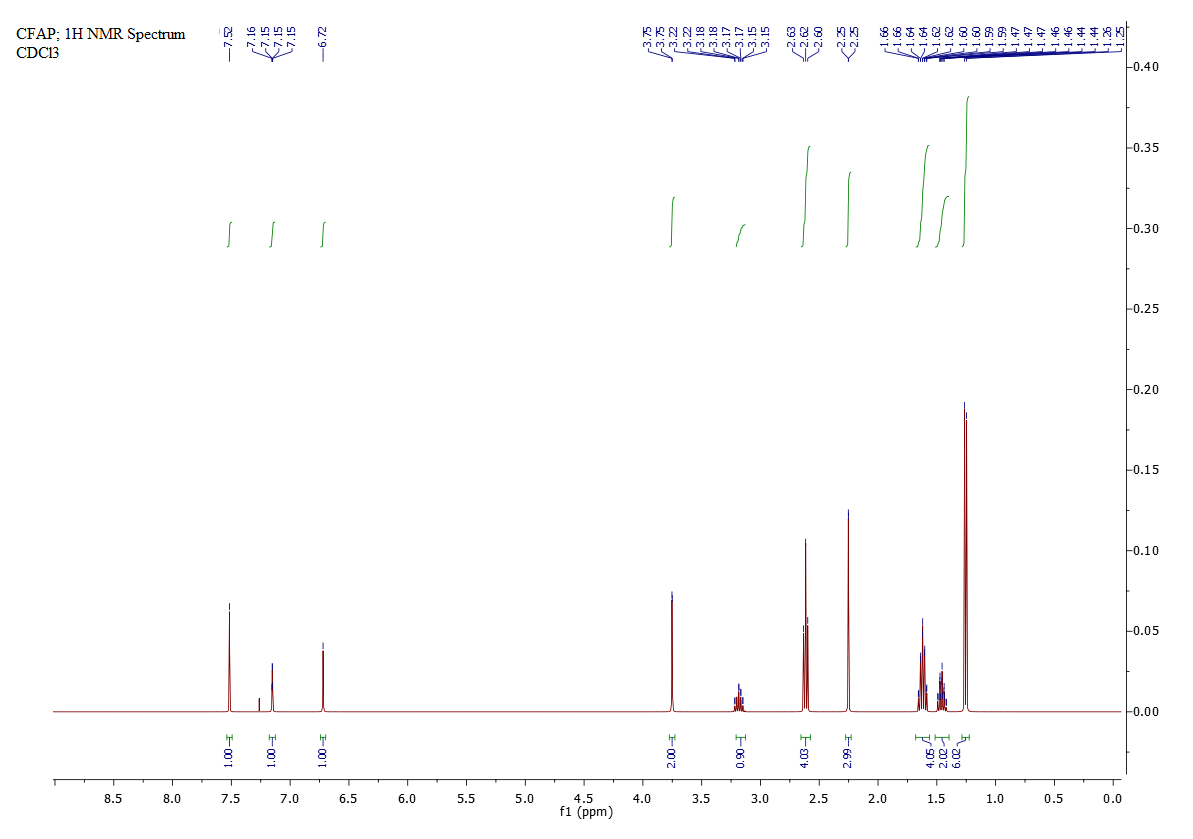


Fig.S3: 1H- NMR spectra of compound 3

**
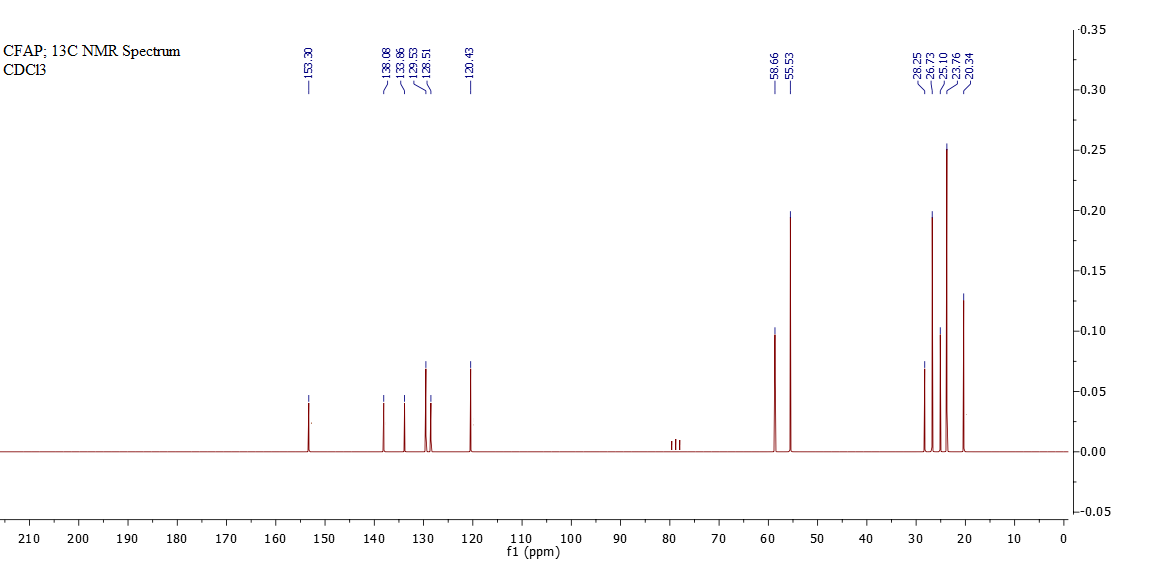
**

Fig.S4: 1H- NMR spectra of compound 3
